# Supplementary figures and images for: Ginger supplementation alleviates autistic behaviors by modulating AKT/GSK3β signaling in mice exposed to prenatal valproic acid
Source: Royal Society of Chemistry journal article supplement (doi:10.1039/d5fo04364f), 2026-01-01

## Gels and Blots images

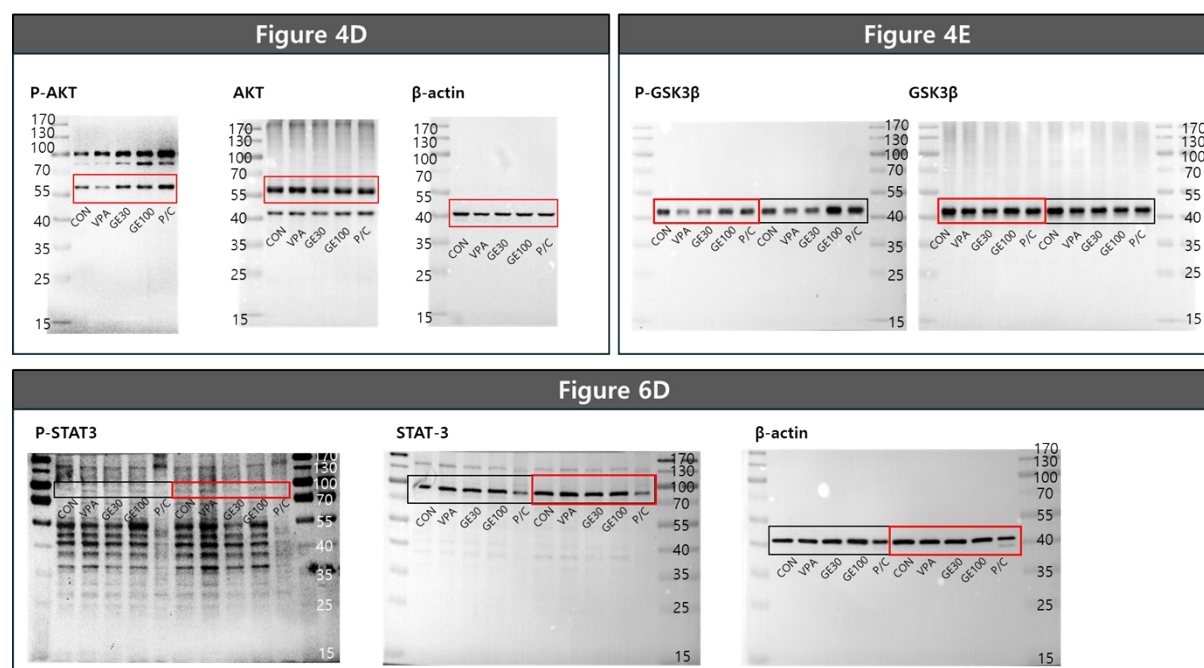

**Figure S1.** The original blots images of Fig. 4D, 4E, and 6D.

Supplement: d5fo04364f1.pdf [file d5fo04364f1.pdf]
